# Supplementary material
Source: Springer Nature journal article supplement (https://www.springermedizin.de/resource/supplementary/12970_2009_173_MOESM2_ESM.pdf/9594520)

A)

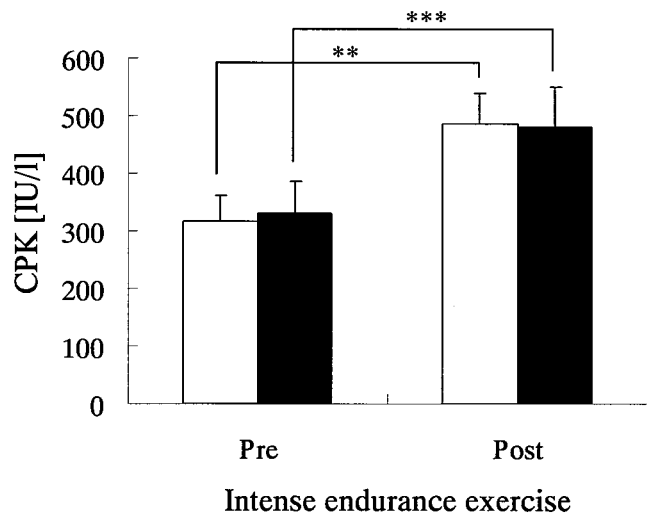

B)

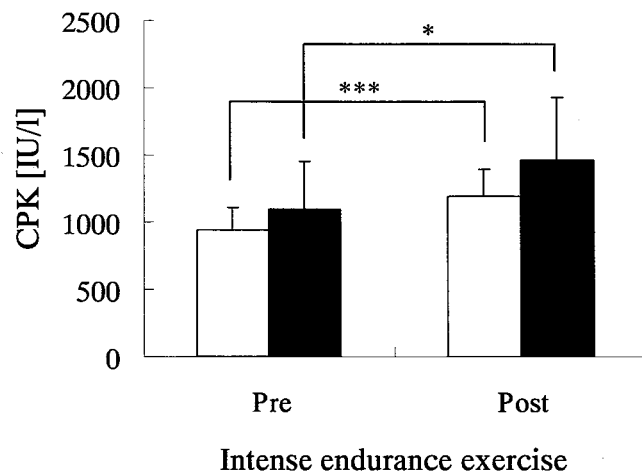

C)

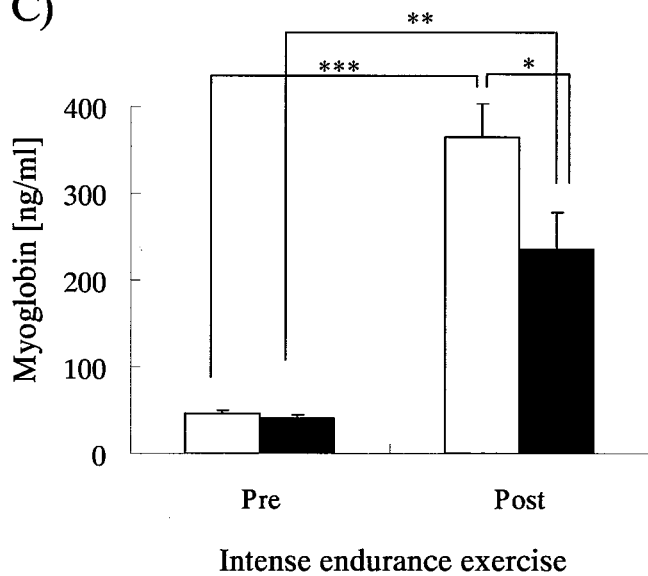

D)

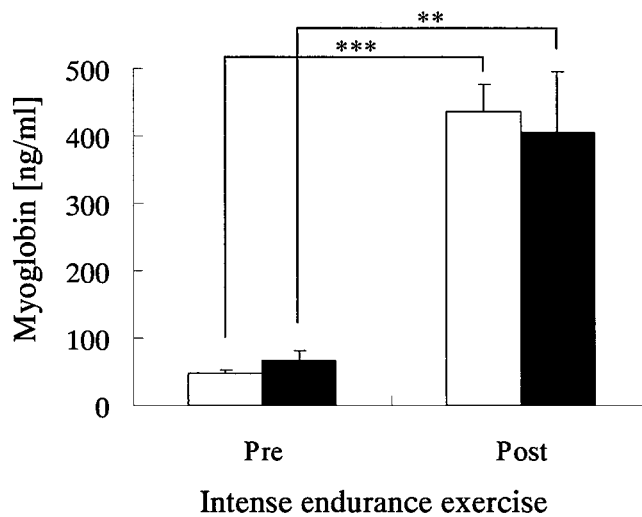

Supplement: MOESM2 [file 9594520]
